# Supplementary material for: Depletion of Lipid Efflux Pump ABCG1 Triggers the Intracellular Accumulation of Extracellular Vesicles and Reduces Aggregation and Tumorigenesis of Metastatic Cancer Cells
Source: PubMed Central journal article supplement (PMC6191470; doi:10.3389/fonc.2018.00376), 2018-10-10

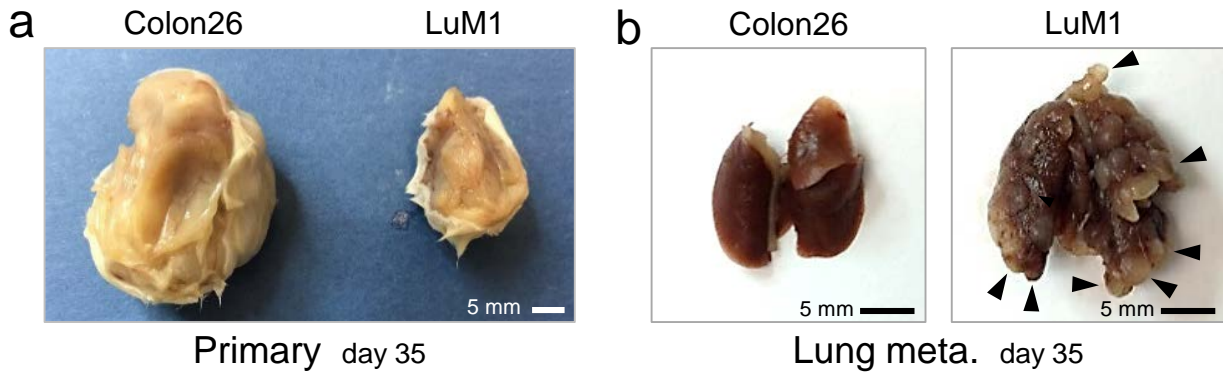

**c**

|                                                     | Colon26           | LuM1                |
|-----------------------------------------------------|-------------------|---------------------|
| Tumor incidence                                     | 1/5 (20%)         | 3/4 (75%)           |
| Number of metastatic nodules                        | 1.0 ± 1.0 (n = 5) | 17.8 ± 9.9 (n=4)    |
| Number of metastatic nodules in cases of metastases | 5.0 (n = 1)       | 23.7 ± 11.3 (n = 3) |

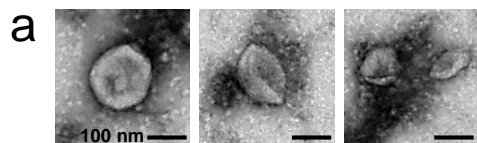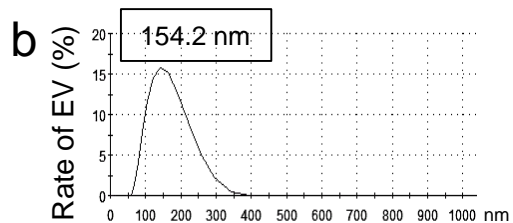

a

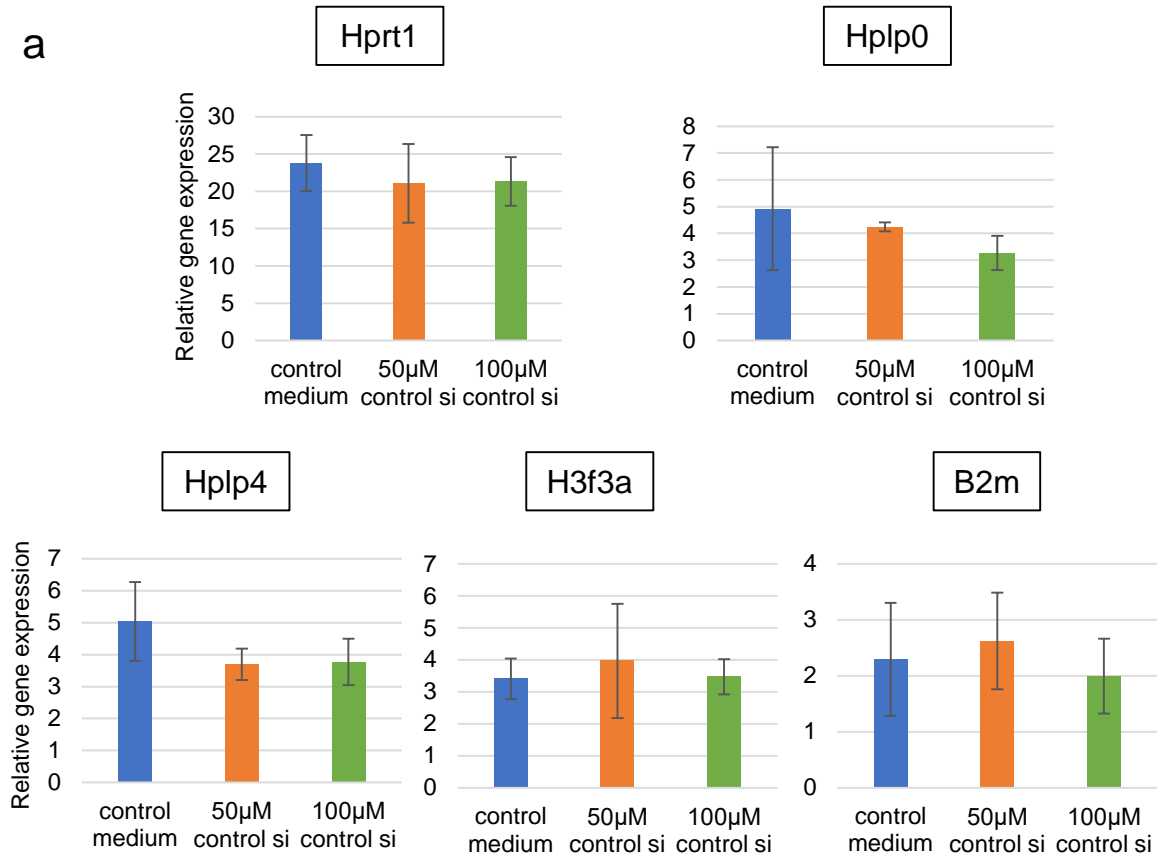

b

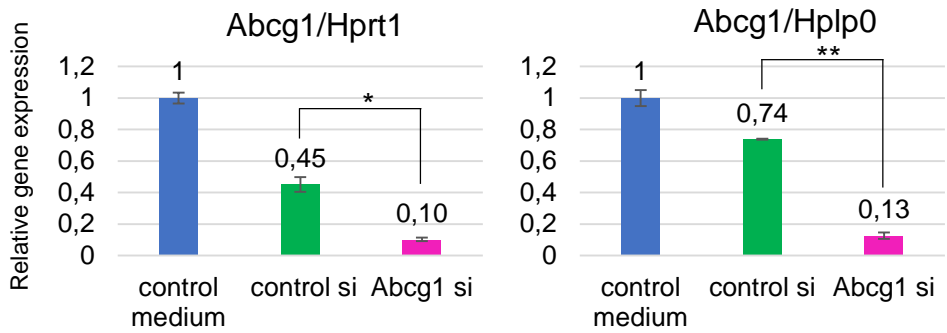

**Figure S4**

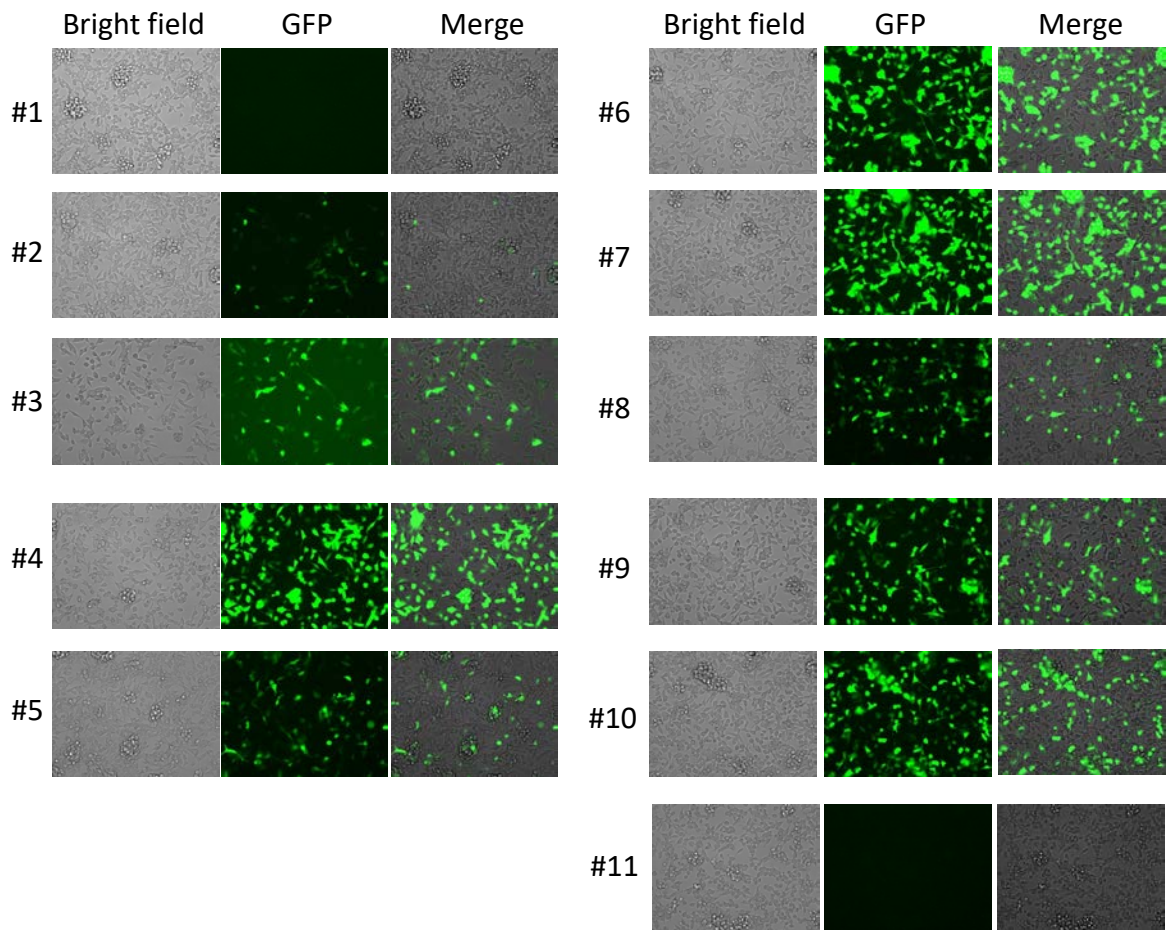

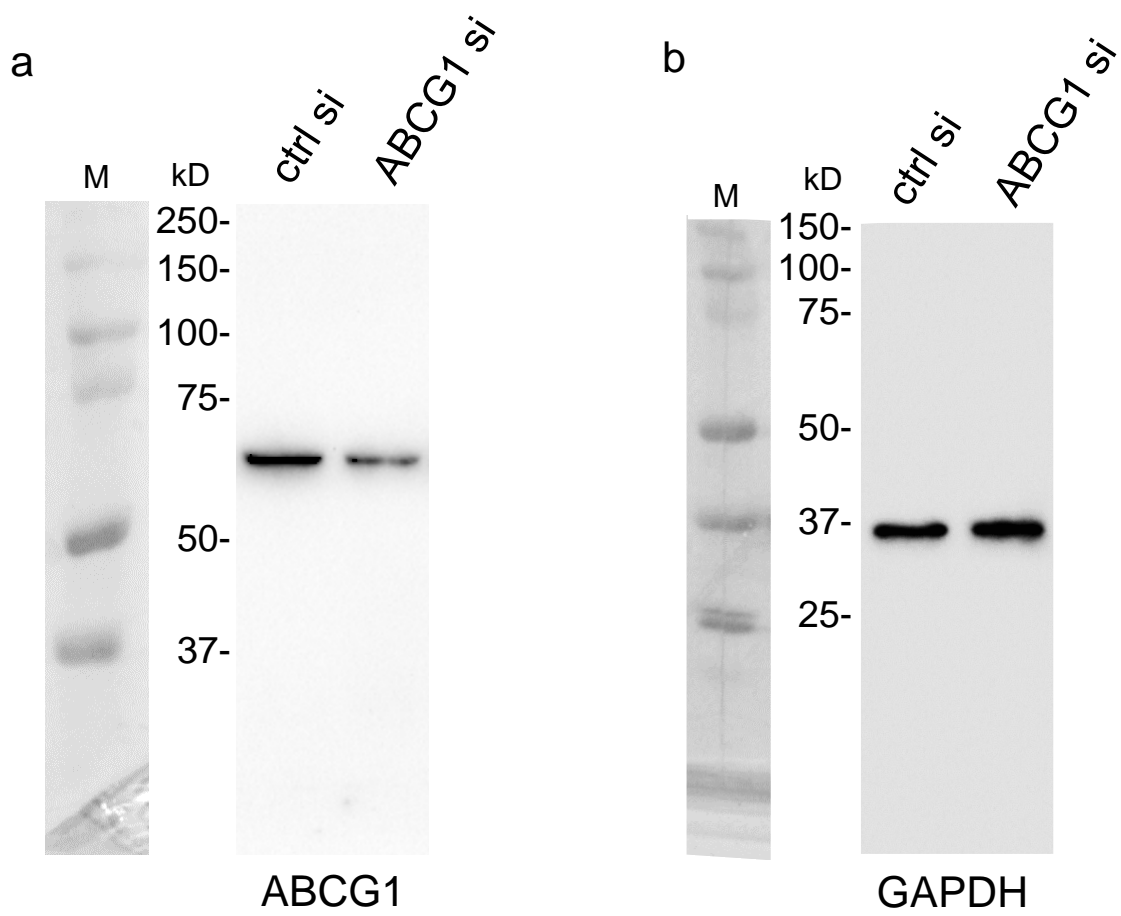

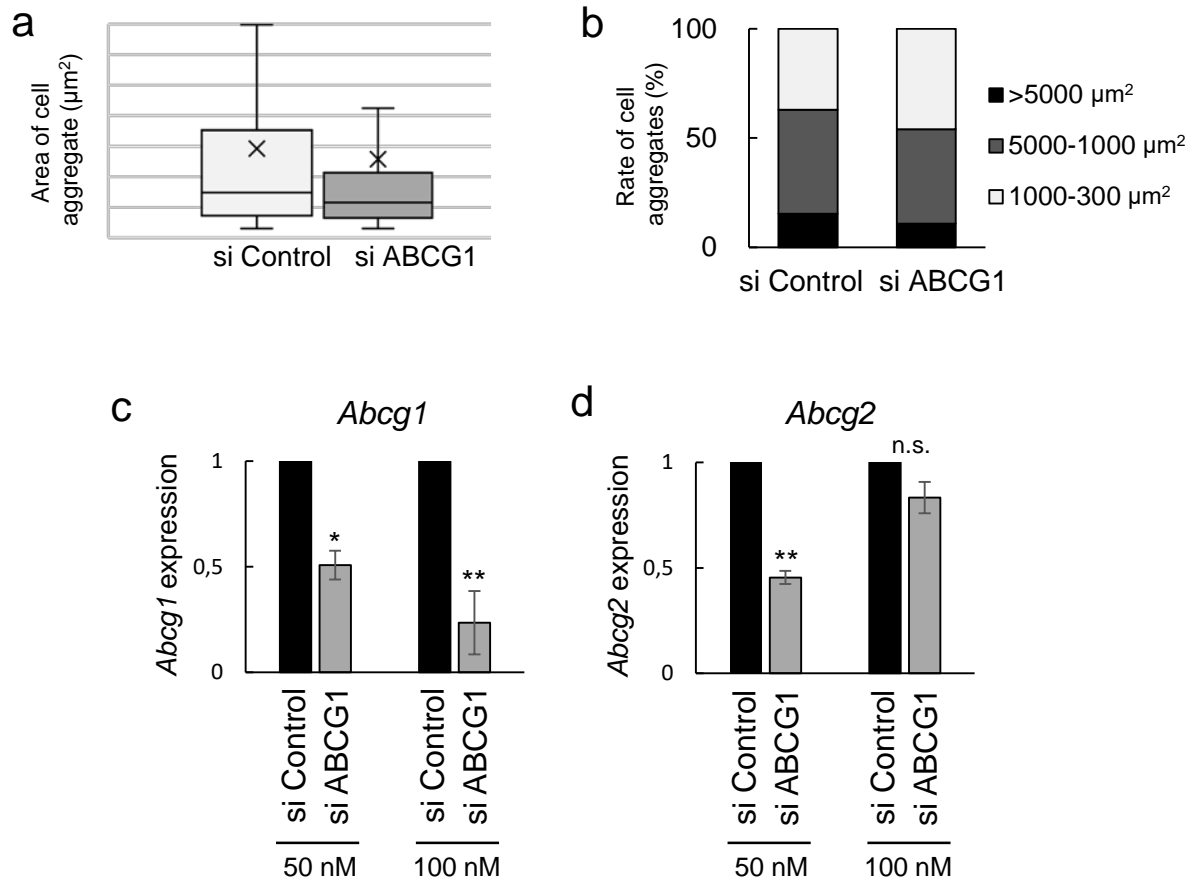

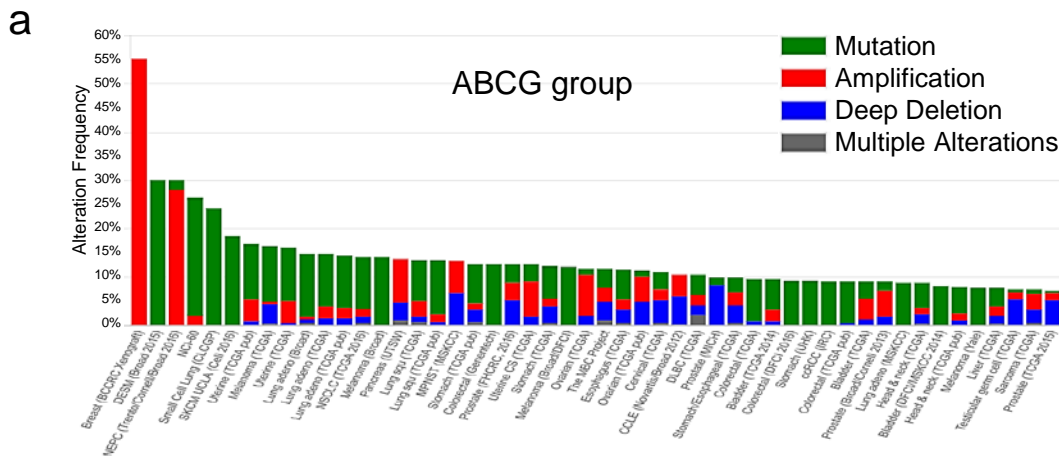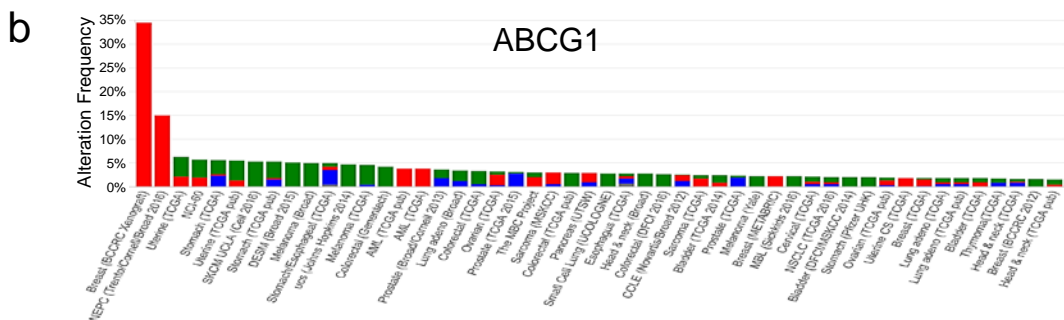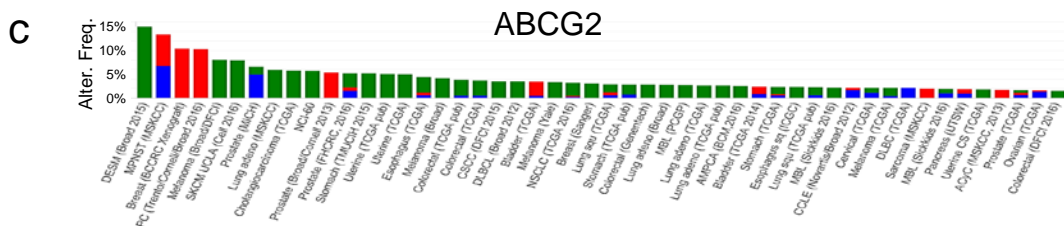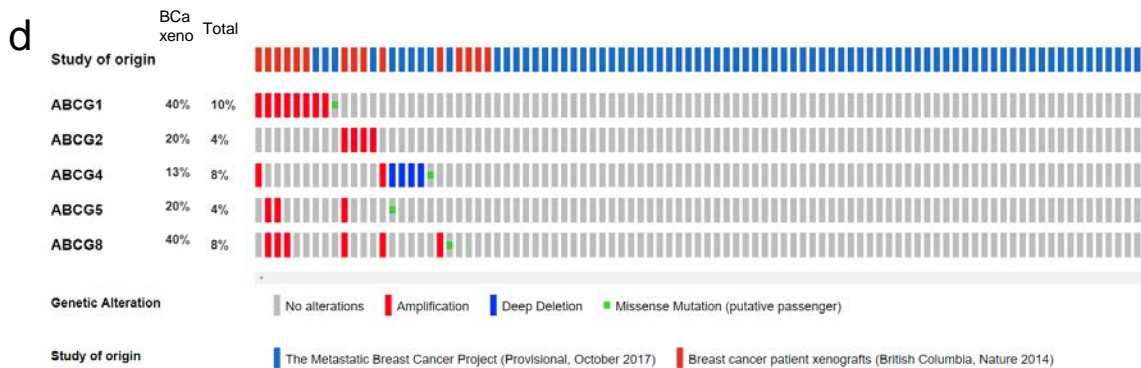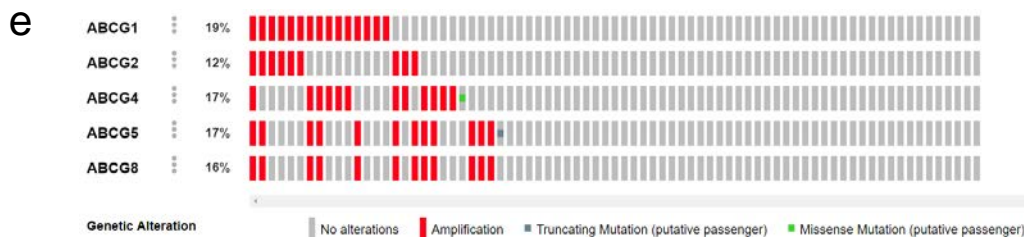

Supplement: Data_Sheet_1.pdf [file Data_Sheet_1.pdf]
